# Supplementary material for: Acoustofluidic particle trapping, manipulation, and release using dynamic-mode cantilever sensors
Source: Royal Society of Chemistry journal article supplement (doi:10.1039/c6an01743f), 2016-11-23
Supplement: c6an01743f1.pdf [file c6an01743f1.pdf]

**Acoustofluidic Particle Trapping, Manipulation, and Release using Dynamic-mode  
Cantilever Sensors**

[Supplementary Information]

Blake N. Johnson <sup>a\*</sup> and Raj Mutharasan <sup>b</sup>

<sup>a</sup> Department of Industrial and Systems Engineering, Virginia Tech, Blacksburg, VA 24061

<sup>b</sup> Department of Chemical and Biological Engineering, Drexel University, Philadelphia, PA  
19104

**Key words:** acoustic streaming, particle manipulation, particle trapping, flow focusing, particle separation

\*Corresponding author

Tel.: (540) 231-0755. Fax: (540) 231-3322

Email: [bnj@vt.edu](mailto:bnj@vt.edu)

## **Supplementary Information**

These supplementary materials contain videos of 100  $\mu\text{m}$  diameter particle trapping in the fundamental ( $n = 1$ ) and second modes ( $n = 2$ ) (Movies S1 and S2, respectively), particle manipulation via switching to the second mode after trapping particles in the fundamental mode (Movie S3), particle manipulation via switching to the 227 kHz mode after manipulating particles with switching to the second mode (Movie S4), and release of trapped particles by switching to a noise signal after trapping particles in the fundamental mode (Movie S5).

Associated video file names are:

Movie S1 – First Mode Particle Trapping -Voltage On (10 V)-16x speed

Movie S2 – Second Mode Particle Trapping -Voltage On (10 V)-16x speed

Movie S3 – Particle Manipulation via Switching from First to Second Mode at  $t \sim 10$  s

Movie S4 – Particle Manipulation via Switching from Second to 227 kHz Mode at  $t \sim 10$  s

Movie S5 – Particle Release via Switching from First Mode to Noise Waveform at  $t \sim 10$  s
